# Supplementary material for: Randomized Study on the Efficacy of Standard Versus Low Roxadustat Dose for Anemia in Patients on Peritoneal Dialysis
Source: PubMed Central journal article supplement — Kidney Int Rep. 2021 Dec 27;7(3):455–64. doi: 10.1016/j.ekir.2021.12.025 (PMC8897289; doi:10.1016/j.ekir.2021.12.025), 2021-12-27
Supplement: mmc1.pdf [file mmc1.pdf]

**Supplementary Table S1. Roxadustat Dose Adjustment rule**

| Change in Hb over past 4 weeks ( g/L ) | Hb Level at Dose-Adjustment Review Visit (g/L) |             |              |                                                                                                                      |
|----------------------------------------|------------------------------------------------|-------------|--------------|----------------------------------------------------------------------------------------------------------------------|
|                                        | <105                                           | 105 to <120 | ≥120 to <130 | ≥130g/L                                                                                                              |
| <-10                                   | ↑                                              | ↑           | No change    | Hold dosing, check Hb every 2 weeks, then resume dosing when Hb <120 g/L, at a dose that is reduced by one dose step |
| -10 to 10                              | ↑                                              | No change   | ↓            |                                                                                                                      |
| >10                                    | No change                                      | ↓           | ↓            |                                                                                                                      |

Adapted from Chen et al. *N Engl J Med.* 2019 Sep 12;381(11):1011-1022.

Abbreviations: Hb=hemoglobin; ↑ = increases; ↓ = decreases

The maximum dose was 2.5 mg/Kg.

Dose adjustment for Hb responses: Dose increases (↑) and reductions (↓) were preset according to dose steps as 20, 40, 50, 70, 100, 120, 150, 200, and 250 mg in standard-dose group and 20, 40, 50, 70, 90, 110, 130, 150, 170, 190, 210, 230, 250mg in low-dose group.

One dose reduction for excessive erythropoiesis was recommended every time.

**Supplementary Table S2. Data collection schedule during baseline evaluation and follow-up in the study**

| Data Elements                                 | Baseline | Week 2 | Week 4 | Week 8 | Week 12 |
|-----------------------------------------------|----------|--------|--------|--------|---------|
| Demographics                                  | ✓        |        |        |        |         |
| Laboratory data                               |          |        |        |        |         |
| Complete blood counts and reticulocyte counts | ✓        | ✓      | ✓      | ✓      | ✓       |
| Biochemical indexes                           | ✓        |        |        |        | ✓       |
| Dialysis adequacy                             | ✓        |        |        |        |         |
| Medications use and dosage                    | ✓        | ✓      | ✓      | ✓      | ✓       |
| Clinical symptoms and adverse events          | ✓        | ✓      | ✓      | ✓      | ✓       |
| Adherence to roxadustat protocol              | ✓        | ✓      | ✓      | ✓      | ✓       |

**Supplementary Table S3. Comparison of Baseline characteristics between the two roxadustat initial-dose groups (appendix)**

| Category/statistic                     | Total<br>(n=100)     | Standard-dose group*<br>(n=50) | Low-dose group<br>(n=50) | P     |
|----------------------------------------|----------------------|--------------------------------|--------------------------|-------|
| Weight (Kg)                            |                      |                                |                          | 0.56  |
| ≥45 & ≤50                              | 14 (14.0%)           | 9 (18.0%)                      | 5 (10.0%)                |       |
| >50 & ≤70                              | 42 (42%)             | 22 (44.0%)                     | 20 (40.0%)               |       |
| >70 & ≤90                              | 39 (39.0%)           | 17 (34.0%)                     | 22 (44.0%)               |       |
| >90                                    | 5 (5.0%)             | 2 (4.0%)                       | 3 (6.0%)                 |       |
| Calcium (mmol/L)                       | 2.3 ± 0.2            | 2.3 ± 0.2                      | 2.3 ± 0.2                | 0.37  |
| Phosphate (mmol/L)                     | 1.7 ± 0.4            | 1.7 ± 0.3                      | 1.8 ± 0.4                | 0.24  |
| Potassium (mmol/L)                     | 4.3 ± 0.6            | 4.3 ± 0.5                      | 4.2 ± 0.6                | 0.54  |
| Sodium (mmol/L)                        | 139.1 ± 2.3          | 138.7 ± 2.4                    | 139.4 ± 2.1              | 0.13  |
| Bicarbonate (mmol/L)                   | 27.0 ± 2.5           | 27.2 ± 2.3                     | 26.9 ± 2.6               | 0.56  |
| iPTH (pg/ml)                           | 290.1 ± 197.6        | 278.6 ± 177.4                  | 301.5 ± 217.2            |       |
| Median (IQR)                           | 252.6 (169.1, 368.9) | 261.9 (159.5, 366.8)           | 248.5 (175.0, 380.8)     | 0.67* |
| Total Kt/V                             | 1.9 ± 0.3            | 1.9 ± 0.3                      | 1.9 ± 0.3                |       |
| Median (IQR)                           | 1.9 (1.7, 2.1)       | 1.9 (1.7, 2.2)                 | 1.9 (1.6, 2.1)           | 0.58  |
| Peritoneal Kt/V                        | 1.5 ± 0.5            | 1.6 ± 0.5                      | 1.5 ± 0.5                |       |
| Median (IQR)                           | 1.5 (1.2, 1.9)       | 1.6 (1.3, 2.0)                 | 1.5 (1.1, 1.9)           | 0.46  |
| Renal Kt/V                             | 0.4 ± 0.5            | 0.4 ± 0.5                      | 0.4 ± 0.4                |       |
| Median (IQR)                           | 0.3 (0, 0.7)         | 0.1 (0, 0.6)                   | 0.3 (0, 0.8)             | 0.38* |
| Total Ccr (L/week/1.73m <sup>2</sup> ) | 48.1 ± 9.6           | 47.7 ± 8.5                     | 48.5 ± 10.7              |       |

|                                             |              |                   |                   |                   |       |
|---------------------------------------------|--------------|-------------------|-------------------|-------------------|-------|
|                                             | Median (IQR) | 47.7 (42.9, 53.2) | 47.1 (43.3, 52.9) | 47.9 (42.5, 53.4) | 0.68  |
| Peritoneal Ccr (L/week/1.73m <sup>2</sup> ) |              | 39.6 ± 13.4       | 39.4 ± 14.8       | 39.7 ± 12.1       |       |
|                                             | Median (IQR) | 39.7(33.2, 47.5)  | 40.1 (33.3, 46.7) | 38.8 (32.4, 48.2) | 0.92  |
| Renal Ccr (L/week/1.73m <sup>2</sup> )      |              | 8.6 ± 11.5        | 8.4 ± 12.3        | 8.8 ± 10.9        |       |
|                                             | Median (IQR) | 5.5(0, 13.2)      | 3.0 (0, 12.1)     | 5.9 (0, 14.6)     | 0.43* |

Abbreviations: iPTH, intact parathyroid hormone; Kt/V, urea clearance; CCr, creatinine clearance.

\*Standard-dose, 100mg and 120mg thrice-weekly respectively for patients <60 and ≥60Kg; low-dose, initial dose was 50mg, 70mg, 90mg and 110mg thrice-weekly for patients weighing ≥45Kg and ≤50Kg, >50Kg and ≤70Kg, >70Kg and ≤90Kg, >90Kg and ≤110Kg respectively.

**Supplementary Table S4. Advent events during the study period.**

|            | Age/ sex | Group <sup>※</sup> | Adverse events                | Severity | Relation to roxadustat | Roxadustat administration |
|------------|----------|--------------------|-------------------------------|----------|------------------------|---------------------------|
| Patient.1  | 50+/F    | Standard-dose      | Acid regurgitation            | mild     | definitely-related     | Maintenance               |
| Patient.2  | 50+/M    | Standard-dose      | Acid regurgitation            | mild     | definitely-related     | Maintenance               |
| Patient.3  | 30+/F    | Standard-dose      | Pruritus, fatigue             | moderate | most-likely-related    | Discontinuation           |
| Patient.4  | 50+/F    | Standard-dose      | Acid regurgitation            | mild     | most-likely-related    | Maintenance               |
| Patient.5  | 50+/F    | Standard-dose      | Nausea, vomiting              | moderate | most-likely-related    | Discontinuation           |
| Patient.6  | 50+/F    | Standard-dose      | Fatigue                       | mild     | most-likely-related    | Temporary discontinuation |
| Patient.7  | 50+/F    | Standard-dose      | Hypotention                   | mild     | possibly-related       | Discontinuation           |
| Patient.8  | 30+/F    | Standard-dose      | Nausea, vomiting              | mild     | possibly-related       | Maintenance               |
| Patient.9  | 50+/M    | Standard-dose      | Anorexia                      | mild     | possibly-related       | Maintenance               |
| Patient.10 | 30+/F    | Standard-dose      | Palpitation                   | mild     | unlikely-related       | Maintenance               |
| Patient.11 | 50+/F    | Standard-dose      | Nausea, vomiting, stomachache | mild     | unlikely-related       | Temporary discontinuation |
| Patient.12 | 70+/M    | Standard-dose      | Chest tightness               | mild     | unlikely-related       | Discontinuation           |
| Patient.13 | 50+/M    | Standard-dose      | Fatigue                       | mild     | unlikely-related       | Maintenance               |
| Patient.4  | 50+/F    | Standard-dose      | Sudden hearing loss           | moderate | unlikely-related       | Discontinuation           |
| Patient.9  | 50+/M    | Standard-dose      | Pruritus                      | moderate | unlikely-related       | Maintenance               |
| Patient.14 | 50+/M    | Standard-dose      | Nausea, vomiting              | mild     | unrelated              | Maintenance               |
| Patient.15 | 30+/M    | Low-dose           | Insomnia                      | moderate | definitely-related     | Discontinuation           |
| Patient.16 | 50+/F    | Low-dose           | Sudden hearing loss           | moderate | most-likely-related    | Maintenance               |
| Patient.17 | 50+/M    | Low-dose           | Headache                      | moderate | most-likely-related    | Discontinuation           |
| Patient.18 | 50+/M    | Low-dose           | Vomiting                      | mild     | most-likely-related    | Discontinuation           |
| Patient.19 | 50+/M    | Low-dose           | Acid regurgitation, vomiting  | mild     | possibly-related       | Maintenance               |
| Patient.20 | 50+/F    | Low-dose           | Acid regurgitation            | mild     | possibly-related       | Maintenance               |

|            |       |          |                                                 |          |                  |                 |
|------------|-------|----------|-------------------------------------------------|----------|------------------|-----------------|
| Patient.21 | 30+/M | Low-dose | Fatigue                                         | mild     | possibly-related | Maintenance     |
| Patient.22 | 50+/M | Low-dose | Nausea, anorexia, dizziness, palpitation        | moderate | possibly-related | Discontinuation |
| Patient.23 | 50+/M | Low-dose | Elevation of blood pressure, dizziness, fatigue | mild     | unlikely-related | Maintenance     |
| Patient.24 | 30+/M | Low-dose | Pruritus                                        | moderate | unlikely-related | Maintenance     |
| Patient.23 | 50+/M | Low-dose | Nausea                                          | mild     | unlikely-related | Maintenance     |

Abbreviation: F, female. M, male.

\*standard-dose, 100mg and 120mg thrice-weekly respectively for patients <60 and ≥60kg; low-dose, initial dose was 50mg, 70mg, 90mg and 110mg thrice-weekly for patients weighing ≥45Kg and ≤50Kg, >50Kg and ≤70Kg, >70Kg and ≤90Kg, >90Kg and ≤110Kg respectively.

30+, >30 and ≤50 years old; 50+, >50 and ≤70 years old; 70+, >70 years old.

**Supplement Table S5. Proportion of patients with Hb at different levels in the two roxadustat dose groups (patients conversion from ESA treatment)**

| Timepoint | Hb (g/dL) | Standard-dose group, n (%) | Low-dose group, n (%) | P <sup>#</sup> |
|-----------|-----------|----------------------------|-----------------------|----------------|
| Baseline  |           |                            |                       |                |
|           | <100      | 7 (14.6)                   | 7 (14.6)              | 1.00           |
|           | ≥100&≤120 | 41 (85.4)                  | 41 (85.4)             | 1.00           |
|           | >120      | 0 (0)                      | 0 (0)                 | —              |
| Week 2    |           |                            |                       |                |
|           | <100      | 4 (8.3)                    | 9 (18.8)              | 0.14           |
|           | ≥100&≤120 | 38 (79.2)                  | 35 (72.9)             | 0.47           |
|           | >120      | 6 (12.5)                   | 4 (8.3)               | 0.50           |
|           | >130      | 2(4.2)                     | 1(2.0)                | 0.56           |
| Week 4    |           |                            |                       |                |
|           | <100      | 4 (8.3)                    | 8 (16.7)              | 0.22           |
|           | ≥100&≤120 | 28 (58.3)                  | 28 (58.3)             | 1.00           |
|           | >120      | 16 (33.3)                  | 12 (25.0)             | 0.37           |
|           | >130      | 3(6.3)                     | 3(6.3)                | 1.00           |
| Week 8    |           |                            |                       |                |
|           | <100      | 2 (4.2)                    | 10 (20.8)             | 0.01           |
|           | ≥100&≤120 | 33 (68.8)                  | 22 (45.8)             | 0.02           |
|           | >120      | 13 (27.1)                  | 16 (33.3)             | 0.51           |
|           | >130      | 4(8.3)                     | 6(12.5)               | 0.50           |
| Week 12   |           |                            |                       |                |
|           | <100      | 3 (6.3)                    | 10 (20.8)             | 0.04           |
|           | ≥100&≤120 | 31 (64.6)                  | 25 (52.1)             | 0.21           |
|           | >120      | 14 (29.2)                  | 13 (27.1)             | 0.82           |
|           | >130      | 1(2.0)                     | 4(8.3)                | 0.17           |

# At each timepoint, comparison between groups were performed at each category of Hb level range by 2×2 crosstabs.

**Supplement Table S6. Proportion of patients with Hb at different levels in the two roxadustat dose groups (per-protocol population)**

| Timepoint       | Hb (g/dL) | Standard-dose group, n (%) | Low-dose group, n (%) | P <sup>#</sup> |
|-----------------|-----------|----------------------------|-----------------------|----------------|
| <b>Baseline</b> |           |                            |                       |                |
|                 | <100      | 7 (14.0)                   | 7 (14.0)              | 1.00           |
|                 | ≥100&≤120 | 43 (86)                    | 43 (86)               | 1.00           |
|                 | >120      | 0 (0)                      | 0 (0)                 | —              |
| <b>Week 2</b>   |           |                            |                       |                |
|                 | <100      | 3 (6.7)                    | 9 (18.8)              | 0.12           |
|                 | ≥100&≤120 | 34 (75.6)                  | 35 (72.9)             | 0.77           |
|                 | >120      | 8 (17.8)                   | 4 (8.3)               | 0.22           |
|                 | >130      | 2(4.4)                     | 1(2.1)                | 0.61           |
| <b>Week 4</b>   |           |                            |                       |                |
|                 | <100      | 3 (7.0)                    | 8 (17.0)              | 0.20           |
|                 | ≥100&≤120 | 22 (51.2)                  | 28 (59.6)             | 0.42           |
|                 | >120      | 18 (41.9)                  | 11 (23.4)             | 0.06           |
|                 | >130      | 7(16.3)                    | 3(6.4)                | 0.18           |
| <b>Week 8</b>   |           |                            |                       |                |
|                 | <100      | 1 (2.5)                    | 8 (17.8)              | 0.03           |
|                 | ≥100&≤120 | 25 (62.5)                  | 21 (46.7)             | 0.14           |
|                 | >120      | 14 (28.0)                  | 16 (35.6)             | 0.96           |
|                 | >130      | 6 (15.0)                   | 6 (13.3)              | 0.83           |
| <b>Week 12</b>  |           |                            |                       |                |
|                 | <100      | 2 (5.4)                    | 7 (16.3)              | 0.17           |
|                 | ≥100&≤120 | 20 (54.1)                  | 23 (53.5)             | 0.96           |
|                 | >120      | 15 (40.5)                  | 13 (30.2)             | 0.34           |
|                 | >130      | 3 (8.1)                    | 4 (9.3)               | 1.00           |

# At each timepoint, comparison between groups were performed at each category of Hb level range by 2×2 crosstabs.



Supplementary Figure. Comparison of hemoglobin responses between the standard-dose group and the low-dose group (per-protocol population)

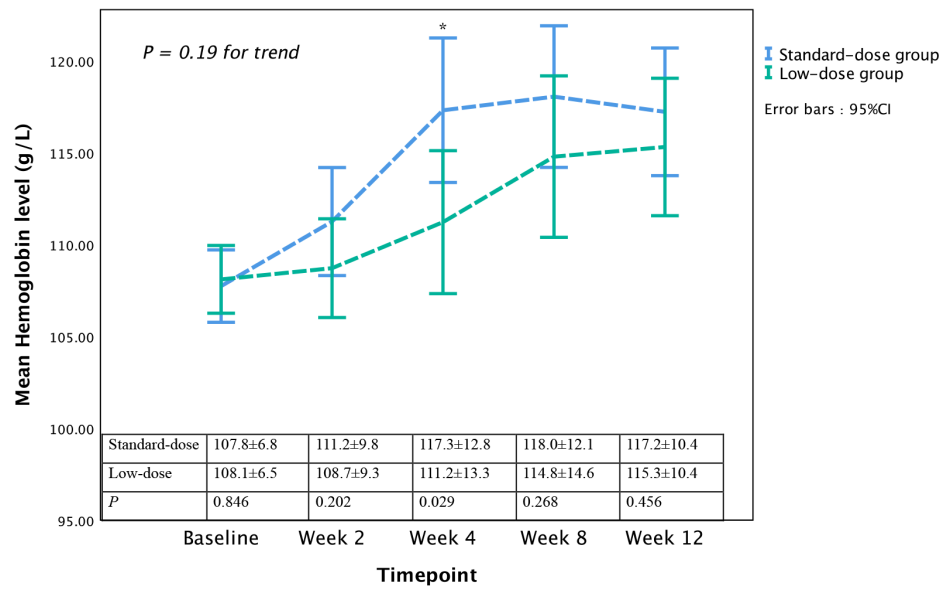

\**P*<0.05 between the standard-dose group and the low-dose group

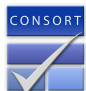

## CONSORT 2010 checklist of information to include when reporting a randomised trial\*

| Section/Topic             | Item No | Checklist item                                                                                                                        | Reported on page No |
|---------------------------|---------|---------------------------------------------------------------------------------------------------------------------------------------|---------------------|
| <b>Title and abstract</b> |         |                                                                                                                                       |                     |
|                           | 1a      | Identification as a randomised trial in the title                                                                                     | P1                  |
|                           | 1b      | Structured summary of trial design, methods, results, and conclusions (for specific guidance see CONSORT for abstracts)               | P3                  |
| <b>Introduction</b>       |         |                                                                                                                                       |                     |
| Background and objectives | 2a      | Scientific background and explanation of rationale                                                                                    | P5                  |
|                           | 2b      | Specific objectives or hypotheses                                                                                                     | P6                  |
| <b>Methods</b>            |         |                                                                                                                                       |                     |
| Trial design              | 3a      | Description of trial design (such as parallel, factorial) including allocation ratio                                                  | P6                  |
|                           | 3b      | Important changes to methods after trial commencement (such as eligibility criteria), with reasons                                    | NA                  |
| Participants              | 4a      | Eligibility criteria for participants                                                                                                 | P6                  |
|                           | 4b      | Settings and locations where the data were collected                                                                                  | P6                  |
| Interventions             | 5       | The interventions for each group with sufficient details to allow replication, including how and when they were actually administered | P7                  |
| Outcomes                  | 6a      | Completely defined pre-specified primary and secondary outcome measures, including how and when they were assessed                    | P9                  |
|                           | 6b      | Any changes to trial outcomes after the trial commenced, with reasons                                                                 | NA                  |
| Sample size               | 7a      | How sample size was determined                                                                                                        | P11                 |
|                           | 7b      | When applicable, explanation of any interim analyses and stopping guidelines                                                          | NA                  |
| Randomisation:            |         |                                                                                                                                       |                     |
| Sequence                  | 8a      | Method used to generate the random allocation sequence                                                                                | P7                  |

|                                                      |     |                                                                                                                                                                                             |                |
|------------------------------------------------------|-----|---------------------------------------------------------------------------------------------------------------------------------------------------------------------------------------------|----------------|
| generation                                           | 8b  | Type of randomisation; details of any restriction (such as blocking and block size)                                                                                                         | P7             |
| Allocation concealment mechanism                     | 9   | Mechanism used to implement the random allocation sequence (such as sequentially numbered containers), describing any steps taken to conceal the sequence until interventions were assigned | P7             |
| Implementation                                       | 10  | Who generated the random allocation sequence, who enrolled participants, and who assigned participants to interventions                                                                     | P7             |
| Blinding                                             | 11a | If done, who was blinded after assignment to interventions (for example, participants, care providers, those assessing outcomes) and how                                                    | P7             |
|                                                      | 11b | If relevant, description of the similarity of interventions                                                                                                                                 | NA             |
| Statistical methods                                  | 12a | Statistical methods used to compare groups for primary and secondary outcomes                                                                                                               | P10            |
|                                                      | 12b | Methods for additional analyses, such as subgroup analyses and adjusted analyses                                                                                                            | P10            |
| <b>Results</b>                                       |     |                                                                                                                                                                                             |                |
| Participant flow (a diagram is strongly recommended) | 13a | For each group, the numbers of participants who were randomly assigned, received intended treatment, and were analysed for the primary outcome                                              | P 11, FIGURE 1 |
|                                                      | 13b | For each group, losses and exclusions after randomisation, together with reasons                                                                                                            | P11, FIGURE 1  |
| Recruitment                                          | 14a | Dates defining the periods of recruitment and follow-up                                                                                                                                     | P11            |
|                                                      | 14b | Why the trial ended or was stopped                                                                                                                                                          | NA             |
| Baseline data                                        | 15  | A table showing baseline demographic and clinical characteristics for each group                                                                                                            | TABLE 1        |
| Numbers analysed                                     | 16  | For each group, number of participants (denominator) included in each analysis and whether the analysis was by original assigned groups                                                     | P12 , FIGURE 1 |
| Outcomes and estimation                              | 17a | For each primary and secondary outcome, results for each group, and the estimated effect size and its precision (such as 95% confidence interval)                                           | P13            |
|                                                      | 17b | For binary outcomes, presentation of both absolute and relative effect sizes is recommended                                                                                                 | P13            |
| Ancillary analyses                                   | 18  | Results of any other analyses performed, including subgroup analyses and adjusted analyses, distinguishing pre-specified from exploratory                                                   | P12-14         |
| Harms                                                | 19  | All important harms or unintended effects in each group (for specific guidance see CONSORT for harms)                                                                                       | P11            |
| <b>Discussion</b>                                    |     |                                                                                                                                                                                             |                |
| Limitations                                          | 20  | Trial limitations, addressing sources of potential bias, imprecision, and, if relevant, multiplicity of analyses                                                                            | P16-17         |

|                          |    |                                                                                                               |        |
|--------------------------|----|---------------------------------------------------------------------------------------------------------------|--------|
| Generalisability         | 21 | Generalisability (external validity, applicability) of the trial findings                                     | P16    |
| Interpretation           | 22 | Interpretation consistent with results, balancing benefits and harms, and considering other relevant evidence | P14-16 |
| <b>Other information</b> |    |                                                                                                               |        |
| Registration             | 23 | Registration number and name of trial registry                                                                | P3, P6 |
| Protocol                 | 24 | Where the full trial protocol can be accessed, if available                                                   | P3, P6 |
| Funding                  | 25 | Sources of funding and other support (such as supply of drugs), role of funders                               | P18    |

\*We strongly recommend reading this statement in conjunction with the CONSORT 2010 Explanation and Elaboration for important clarifications on all the items. If relevant, we also recommend reading CONSORT extensions for cluster randomised trials, non-inferiority and equivalence trials, non-pharmacological treatments, herbal interventions, and pragmatic trials. Additional extensions are forthcoming: for those and for up to date references relevant to this checklist, see [www.consort-statement.org](http://www.consort-statement.org).
